# Supplementary material for: Laser-Induced Graphene Electrochemical Sensors: An Emerging Platform for Agri-Food and Environmental Detection
Source: MDPI journal article supplement (doi:10.3390/chemosensors13120432), 2025-12-15
Supplement: s1 [file chemosensors-4011242-supplementary.pdf › chemosensors-4011242-supplementary.pdf]

# Support Information

## **Laser-Induced Graphene Electrochemical Sensors : An Emerging Platform for Agri-Food and Environmental Detection**

Xinyang Cui <sup>1,2</sup>, Tingting Gu <sup>1,\*</sup>, Kexin Ma <sup>1</sup>, Jiwu Zeng <sup>2,\*</sup> and Hongqi Xia <sup>2,\*</sup>

<sup>1</sup> School of Chemical Engineering, University of Science and Technology Liaoning, Anshan 114051, China;

cuixinyang0327@163.com (X.C.); mkx1987699987@163.com (K.M.)

<sup>2</sup> Key Laboratory of South Subtropical Fruit Biology and Genetic Resource Utilization (MARA),

Guangdong Provincial Key Laboratory of Science and Technology Research on Fruit Tree, Institute of Fruit Tree Research, Guangdong Academy of Agricultural Sciences, Guangzhou 510640, China

\* Correspondence: gutingting@ustl.edu.cn (T.G.); zengjiwu@163.com (J.Z.); xiahongqi@gdaas.cn (H.X.)

Table S1 Typical examples of laser-induced graphene (LIG) based electrochemical sensors for agri-food and environmental detection

| Precursor | Parameters                            | Modification | Analyte          | Linear range              | LOD                    | Sensitivity                        | Real sample           | Recovery | Reference method | ref |
|-----------|---------------------------------------|--------------|------------------|---------------------------|------------------------|------------------------------------|-----------------------|----------|------------------|-----|
| PI        | 10.6 μm/9.2 W/30 mm s <sup>-1</sup>   | bare         | Pb <sup>2+</sup> | 1–5 μg L <sup>-1</sup>    | 0.5 μg L <sup>-1</sup> | 0.1772 μA                          | pond water            | /        | /                | [1] |
|           |                                       |              |                  | 10–100 μg L <sup>-1</sup> |                        | μg <sup>-1</sup> L                 |                       |          |                  |     |
|           |                                       |              |                  | 0.7081 μA                 |                        | μg <sup>-1</sup> L                 |                       |          |                  |     |
| PI        | 10.6 μm/6 W/160 mm s <sup>-1</sup>    | bare         | paraquat         | 0.5–35 μM                 | 0.54 μM                | 46.6 μA                            | tap water             | 96.6%    | /                | [2] |
|           |                                       |              |                  |                           |                        | μM <sup>-1</sup> cm <sup>-2</sup>  |                       |          |                  |     |
|           |                                       |              |                  |                           |                        |                                    |                       |          |                  |     |
| PI        | 10.6 μm/4.5 W/15 cm s <sup>-1</sup>   | bare         | salicylic acid   | 10–1000 μM                | 8.2 μM                 | 82.3 nA                            | persea americana Hass | /        | /                | [3] |
|           |                                       |              |                  |                           |                        | μM <sup>-1</sup> ·cm <sup>-2</sup> |                       |          |                  |     |
|           |                                       |              |                  |                           |                        |                                    |                       |          |                  |     |
| PI        | 10.6 μm/3.12 W/100 mm s <sup>-1</sup> | bare         | glyphosate       | 50–1000 μM                | 5.94 μM                | /                                  | drinking water        | /        | /                | [4] |
|           |                                       |              |                  |                           |                        |                                    |                       |          |                  |     |

|    |                        |      |                                     |                                  |                                |                                                                                                      |                                                    |                                                          |                                                                  |     |
|----|------------------------|------|-------------------------------------|----------------------------------|--------------------------------|------------------------------------------------------------------------------------------------------|----------------------------------------------------|----------------------------------------------------------|------------------------------------------------------------------|-----|
| PI | 5.225W/                | bare | salicylic acid                      | 0.5 $\mu\text{M}$ –500           | 0.16 $\mu\text{M}$             | 10.99 $\mu\text{A}$                                                                                  | lettuce and                                        | lettuce: 99.60%–                                         | artificial                                                       | [5] |
|    | 0.5 $\text{cm s}^{-1}$ |      |                                     | $\mu\text{M}$                    |                                | $\mu\text{M}^{-1}$                                                                                   | watermelon                                         | 100.63%<br>watermelon:<br>97.07%– 100.80%                | neural network<br>and least<br>squares support<br>vector machine |     |
| PI | 6.4 W/30 cm            | bare | $\text{Cd}^{2+}$ , $\text{Pb}^{2+}$ | $\text{Cd}^{2+}$ :25–1000        | $\text{Cd}^{2+}$ : 6.13        | $\text{Cd}^{2+}$ : 0.45<br>$\mu\text{A ppb}^{-1}$                                                    | ore, tap                                           | /                                                        | /                                                                | [6] |
|    | $\text{s}^{-1}$        |      |                                     | ppb<br>$\text{Pb}^{2+}$ : 10–500 | ppb<br>$\text{Pb}^{2+}$ : 2.96 | $\text{cm}^{-2}$<br>$\text{Pb}^{2+}$ : 0.93                                                          | water                                              |                                                          |                                                                  |     |
| PI | 405 nm/2.1W            | bare | naringin<br>hesperidin              | 50 nM–100<br>$\mu\text{M}$       | 11 nM<br>hesperidin<br>: 15 nM | $\mu\text{A ppb}^{-1}$<br>$\text{cm}^{-2}$<br>naringin:<br>0.019 $\mu\text{A}$<br>$\mu\text{M}^{-1}$ | extract of<br>citrus<br>grandis<br>“Tomentosa<br>” | naringin:<br>98.7%–108.7%<br>hesperidin:<br>93.0%–103.7% | /                                                                | [7] |
|    |                        |      |                                     |                                  |                                |                                                                                                      |                                                    |                                                          |                                                                  |     |
|    |                        |      |                                     |                                  |                                |                                                                                                      |                                                    |                                                          |                                                                  |     |
|    |                        |      |                                     |                                  |                                | $\mu\text{M}^{-1}$                                                                                   |                                                    |                                                          |                                                                  |     |

|      |                         |        |                               |                         |                                                    |                                                                                                                      |                                                   |                         |             |      |
|------|-------------------------|--------|-------------------------------|-------------------------|----------------------------------------------------|----------------------------------------------------------------------------------------------------------------------|---------------------------------------------------|-------------------------|-------------|------|
| PI   | 450 nm/4.42             | bare   | sulfadimidine                 | 3–110 $\mu\text{M}$     | 0.03 $\mu\text{M}$                                 | /                                                                                                                    | beef, milk                                        | beef:                   | SPE and GCE | [8]  |
|      | W                       |        |                               |                         |                                                    |                                                                                                                      |                                                   | 93.34%–103.70%          |             |      |
|      | /0.5 cm s <sup>-1</sup> |        |                               |                         |                                                    |                                                                                                                      |                                                   | milk:<br>98.50%–100.80% |             |      |
| PEEK | 3 W                     | bare   | polymethoxylat<br>ed flavones | 5–100                   | $\mu\text{M}$<br>hesperidin<br>: 1.7 $\mu\text{M}$ | PMFs: 0.1<br>mA cm <sup>-2</sup><br>mM <sup>-1</sup><br>hesperidin<br>: 0.17 mA<br>cm <sup>-2</sup> mM <sup>-1</sup> | <i>Citri</i><br><i>Reticulatae</i><br>Pericarpium | PMFs: 2.36              | HPLC        | [9]  |
|      |                         |        |                               |                         |                                                    |                                                                                                                      |                                                   | PMFs: 91%–107%          |             |      |
|      |                         |        |                               |                         |                                                    |                                                                                                                      |                                                   | hesperidin:90%–99<br>%  |             |      |
| PI   | 3.2 W                   | Fe     | salicylic acid                | 0–400 $\mu\text{M}$     | 0.27 $\mu\text{M}$                                 | 1.98 nA<br>$\mu\text{M}^{-1}$                                                                                        | plant<br>samples<br>under salt<br>stress          | 96%–106%                | HPLC        | [10] |
| PI   | /                       | Pt     | clenbuterol<br>hydrochloride  | 0.1–820.9 $\mu\text{M}$ | 0.072 $\mu\text{M}$                                | 0.2383 $\mu\text{A}$<br>$\mu\text{M}^{-2}$                                                                           | beef                                              | 93.80%–97.00%           | /           | [11] |
| PI   | 355                     | Ag NPs | formaldehyde                  | 0–500 $\mu\text{M}$     | 0.275 $\mu\text{g}$                                | 0.363 $\mu\text{A}$                                                                                                  | /                                                 | 92.9%–103.5%            | /           | [12] |

|    |                                     |                                                        |                           |                             |                         |                                                           |                                                |          |                                                                |      |
|----|-------------------------------------|--------------------------------------------------------|---------------------------|-----------------------------|-------------------------|-----------------------------------------------------------|------------------------------------------------|----------|----------------------------------------------------------------|------|
|    | nm/2.5W/10                          |                                                        |                           |                             | mL <sup>-1</sup>        | μM <sup>-1</sup> cm <sup>-2</sup>                         |                                                |          |                                                                |      |
|    | ms                                  |                                                        |                           |                             |                         |                                                           |                                                |          |                                                                |      |
| PI | 10.6 μm                             | AuNPs                                                  | organophosphorus residues | 3–4000 ng mL <sup>-1</sup>  | 1.2 ng mL <sup>-1</sup> | /                                                         | pakchoi                                        | 99%–105% | /                                                              | [13] |
|    |                                     |                                                        |                           | one-time measurement        |                         |                                                           |                                                |          |                                                                |      |
|    |                                     |                                                        |                           | ts: 1.07–300                |                         |                                                           |                                                |          | potentiometric titration, ICP-OES, and flame atomic absorption |      |
| PI | 10.6 μm/9 W/19.5 cm s <sup>-1</sup> | Bi <sup>3+</sup>                                       | Al <sup>3+</sup>          | ppm incremental measurement | 0.34 ppm                | /                                                         | soil                                           | /        |                                                                | [14] |
|    |                                     |                                                        |                           | ts: 1.76–100                |                         |                                                           |                                                |          |                                                                |      |
|    |                                     |                                                        |                           | ppm                         |                         |                                                           |                                                |          |                                                                |      |
|    |                                     |                                                        |                           |                             |                         |                                                           | river water, snacks, milk, and isotonic drinks |          |                                                                |      |
| PI | 10.6 μm                             | Ag-La(OH) <sub>3</sub> @Dy <sub>2</sub> O <sub>3</sub> | tartrazine                | 0.1–2 μM                    | 0.96 nM                 | 4.23×10 <sup>-4</sup> A μM <sup>-1</sup> cm <sup>-2</sup> |                                                | 96%–104% | /                                                              | [15] |

|    |                          |                                               |            |                           |                        |                                   |                         |              |        |      |
|----|--------------------------|-----------------------------------------------|------------|---------------------------|------------------------|-----------------------------------|-------------------------|--------------|--------|------|
| PI | 3.5 W                    | MoS <sub>2</sub>                              | glyphosate | 10–90 μM                  | MoS <sub>2</sub> /LIG: |                                   |                         |              | LC-MS  | [16] |
|    |                          | MoS <sub>2</sub> /LIG:                        |            |                           | 47.0 nA                | canned                            | MoS <sub>2</sub> /LIG:  |              |        |      |
|    |                          | 4.0 μM                                        |            |                           | μM <sup>-1</sup>       | pinto beans                       | 86.3%–111.1%            |              |        |      |
|    |                          | MoSe <sub>2</sub> /LI                         |            |                           | MoSe <sub>2</sub> /LI  | and                               | MoSe <sub>2</sub> /LIG: |              |        |      |
|    |                          | MoSe <sub>2</sub>                             |            |                           | G: 6.1 μM              | G: 22.8 nA                        | soybeans                | 79.3–98.8%   |        |      |
| PI | /                        | NiCo-LDH                                      | glucose    | 0.5–270 μM<br>0.27–3.6 mM | 0.05 μM                | μM <sup>-1</sup>                  | orange juice,           | 96.0%–102.0% | UV-Vis | [17] |
|    |                          |                                               |            |                           |                        | 9.750 μA                          |                         |              |        |      |
|    |                          |                                               |            |                           |                        | μM <sup>-1</sup> cm <sup>-2</sup> |                         |              |        |      |
|    |                          |                                               |            |                           |                        | (0.5–270                          |                         |              |        |      |
|    |                          |                                               |            |                           | μM)                    | tea, cola,                        |                         |              |        |      |
|    |                          |                                               |            |                           |                        | 3.760 μA                          | vitamin                 |              |        |      |
|    |                          |                                               |            |                           |                        | μM <sup>-1</sup> cm <sup>-2</sup> | drinks, and             |              |        |      |
|    |                          |                                               |            |                           |                        | (0.27–3.6                         | honey                   |              |        |      |
|    |                          |                                               |            |                           |                        | mM)                               |                         |              |        |      |
| PI | 6 W/2 mm s <sup>-1</sup> | Ti <sub>3</sub> C <sub>2</sub> T <sub>x</sub> | benomyl    | 10–6000 nM                | 5.8 nM                 | 169.9 μA                          | apple, pear,            | 91.6%–108.0% | /      | [18] |
|    |                          |                                               |            |                           |                        | μM <sup>-1</sup> cm <sup>-2</sup> | mushroom,               |              |        |      |
|    |                          |                                               |            |                           |                        |                                   | environmen              |              |        |      |

|     |                                      |                          |                                               |                                            |                              |                                               |                                    |                                                                       |   |      |
|-----|--------------------------------------|--------------------------|-----------------------------------------------|--------------------------------------------|------------------------------|-----------------------------------------------|------------------------------------|-----------------------------------------------------------------------|---|------|
|     |                                      |                          |                                               |                                            |                              |                                               | tal water                          |                                                                       |   |      |
| PET | 405 nm/400<br>mW                     | AgNPs                    | carbosulfan                                   | 0.01–10 mg<br>kg <sup>-1</sup>             | 0.005 mg<br>kg <sup>-1</sup> | /                                             | apple,<br>orange, rice             | 90%–105%                                                              | / | [19] |
| PI  | 405 nm/2 W                           | MWCNT-<br>PANI           | 4-aminophenol                                 | 0.1–55 µM                                  | 0.006 µM                     | 46.6 µA<br>µM <sup>-1</sup> cm <sup>-2</sup>  | tap water<br>paracetamol<br>tablet | tap water:<br>96.40%–98.17%<br>paracetamol tablet:<br>100.63%–105.41% | / | [20] |
| PI  | 405 nm/2 W<br>/50 mm s <sup>-1</sup> | f-MWCNT/<br>AuNPs        | NO <sup>2-</sup>                              | 10–140 µM                                  | 0.9 µM                       | /                                             | real water                         | 90.76%–96.15%                                                         | / | [21] |
| PI  | 450 nm/1.54<br>W/                    | GOx                      | glucose                                       | 0–8 mM                                     | 0.431 mM                     | 43.15 µA<br>mM <sup>-1</sup> cm <sup>-2</sup> | /                                  | 96.0%–102.0%                                                          |   | [22] |
| PI  | 3 W                                  | Salmonella<br>antibodies | salmonella<br>enterica serovar<br>typhimurium | 25–10 <sup>5</sup> CFU<br>mL <sup>-1</sup> | 13±7 CFU<br>mL <sup>-1</sup> | 24 Ω log<br>CFU <sup>-1</sup> mL              | chicken<br>broth                   | /                                                                     | / | [23] |
| PI  | 50.8 cm/s                            | PDA                      | atenolol                                      | 100–800 µM                                 | 80 µM                        | 0.020±0.04<br>µA µM <sup>-1</sup>             | /                                  | /                                                                     | / | [24] |
| PI  | 355 nm                               | PEDOT                    | SCN <sup>-</sup>                              | 10–300 µM                                  | 0.52 µM                      | 3.06 µA                                       | milk and                           | 96.2%–105.5%                                                          | / | [25] |

|    |                                 |                                             |                                                             |                                      |                                                                                                                                                |                                                                                                                     |                                  |                                                                          |                                                                                          |      |
|----|---------------------------------|---------------------------------------------|-------------------------------------------------------------|--------------------------------------|------------------------------------------------------------------------------------------------------------------------------------------------|---------------------------------------------------------------------------------------------------------------------|----------------------------------|--------------------------------------------------------------------------|------------------------------------------------------------------------------------------|------|
|    |                                 |                                             |                                                             |                                      |                                                                                                                                                | $\mu\text{M}^{-1}\text{ cm}^{-2}$                                                                                   | artificial                       |                                                                          |                                                                                          |      |
|    |                                 |                                             |                                                             |                                      |                                                                                                                                                |                                                                                                                     | saliva                           |                                                                          |                                                                                          |      |
| PI | /                               | ampter/nPt                                  | listeria<br>monocytogenes                                   | 1–10 <sup>5</sup><br>CFU/10 mL       | 10 CFU 10<br>mL <sup>-1</sup>                                                                                                                  | 154 mF<br>log CFU <sup>-1</sup><br>mL                                                                               | hydroponic<br>water<br>(lettuce) | /                                                                        | /                                                                                        | [26] |
| PI | 3.6 W/20 cm<br>s <sup>-1</sup>  | OPH/AuNPs                                   | methyl<br>parathion                                         | 20–500 $\mu\text{M}$                 | 0.01 $\mu\text{M}$                                                                                                                             | 2.13 nA/lg<br>( $\mu\text{M}$ )                                                                                     | spinach and<br>apple             | /                                                                        | /                                                                                        | [27] |
| PI | 2.5 W/200<br>mm s <sup>-1</sup> | AuNPs-pPy-<br>Chi                           | ascorbic acid                                               | 0.25–5.00<br>mM<br>5.00–25.00<br>mM  | 0.22 mmol<br>L <sup>-1</sup>                                                                                                                   | /                                                                                                                   | orange juice                     | 97%–109.1%                                                               | standard<br>spectrophotom<br>etric method                                                | [28] |
| PI | 405 nm/1<br>W/20 ms             | solid contact<br>ion selective<br>membranes | NH <sub>4</sub> <sup>+</sup> , NO <sub>3</sub> <sup>-</sup> | 10 <sup>-5</sup> –10 <sup>-1</sup> M | NH <sub>4</sub> <sup>+</sup> :<br>28.2±25.0<br>$\mu\text{mol L}^{-1}$<br>NO <sub>3</sub> <sup>-</sup> :<br>20.6±14.8<br>$\mu\text{mol L}^{-1}$ | NH <sub>4</sub> <sup>+</sup> :<br>55.2±3.6<br>mV/decad<br>e NO <sub>3</sub> <sup>-</sup> :<br>–53.4±1.1<br>mV/decad | soil                             | NH <sub>4</sub> <sup>+</sup> : 96%<br>NO <sub>3</sub> <sup>-</sup> : 95% | commercial<br>NO <sub>3</sub> <sup>-</sup> or NH <sub>4</sub> <sup>+</sup><br>electrodes | [29] |



SPE, screen print electrode; GCE, glassy carbon electrode; HPLC, high-performance liquid chromatograph; ICP-OES, inductively coupled plasma-optical emission spectrometry; LC-MS, liquid chromatography coupled with mass spectrometry; UV-Vis: Ultraviolet-Visible Spectroscopy.

## References

1. Liu, X.; Wang, X.; Li, J.; Qu, M.; Kang, M.; Zhang, C. Nonmodified laser-induced graphene sensors for lead-ion detection. *ACS Appl. Nano Mater.* **2023**, *6*, 3599–3607. <https://doi.org/10.1021/acsanm.2c05307>.
2. Sain, S.; Roy, S.; Mathur, A.; Rajesh, V.M.; Banerjee, D.; Sarkar, B.; Roy, S.S. Electrochemical sensors based on flexible laser-induced graphene for the detection of paraquat in water. *ACS Appl. Nano Mater.* **2022**, *5*, 17516–17525. <https://doi.org/10.1021/acsanm.2c02948>.
3. Perdomo, S.A.; Valencia, D.P.; Velez, G.E.; Jaramillo-Botero, A. Advancing abiotic stress monitoring in plants with a wearable non-destructive real-time salicylic acid laser-induced-graphene sensor. *Biosens. Bioelectron.* **2024**, *255*, 116261, <https://doi.org/10.1016/j.bios.2024.116261>.
4. Lopes, B.V.; Maron, G.K.; Masteghin, M.G.; Balboni, R.D.C.; Silva, S.R.P.; Carreno, N.L.V. Direct-detection of glyphosate in drinking water *via* a scalable and low-cost laser-induced graphene sensor. *Anal. Methods* **2024**, *17*, 808–815, <https://doi.org/10.1039/d4ay01549e>.
5. Li, M.; Zhou, P.; Wang, X.; Wen, Y.; Xu, L.; Hu, J.; Huang, Z.; Li, M. Development of a simple disposable laser-induced porous graphene flexible electrode for portable wireless intelligent voltammetric nanosensing of salicylic acid in agro-products. *Comput. Electron. Agric.* **2021**, *191*, 106502. <https://doi.org/10.1016/j.compag.2021.106502>.
6. Diédhiou, I.; Raouafi, A.; Hamzaoui, S.; Fall, M.; Raouafi, N. Optimizing the preparation of laser-derived 3D porous graphene electrodes for modification-free sensing of heavy metal ions. *Sens. Diagn.* **2025**, *4*, 202–215. <https://doi.org/10.1039/d4sd00290c>.
7. Xia, H.-q.; Qiu, D.; Chen, W.; Mao, G.; Zeng, J. In situ formed and fully integrated laser-induced graphene electrochemical chips for rapid and simultaneous determination of bioflavonoids in citrus fruits. *Microchem. J.* **2023**, *188*, 108474. <https://doi.org/10.1016/j.microc.2023.108474>.
8. Zeng, Q.; Wen, Y.; Li, W.; Xiao, H.; Fu, X.; Shi, Z.; Li, A.; Liang, J.; Tan, C.; Xu, Q.; et al. Smartphone electrochemical sensor based on laser-induced graphene integrated electrode for on-site sulfadimidine detection in beef and milk. *Microchim. Acta* **2025**, *192*, 1–14, <https://doi.org/10.1007/s00604-025-07538-7>.
9. Xia, H.Q.; Zhu, C.; Qiu, D.; Zeng, J. A smartphone-based electrochemical sensing platform for the portable and simultaneous determination of flavonoids in Citri Reticulatae Pericarpium. *Anal Chim Acta* **2024**, *1319*, 342981. <https://doi.org/10.1016/j.aca.2024.342981>.
10. Liu, X.; Xiang, J.; Xue, Y.; Zhao, J.; Ma, X.; Ge, L.; Li, F.; Gai, P. Plant wearable sensor based on flexible laser-induced Fe-doped graphene for in situ monitoring salicylic acid under salt stress. *Sens. Actuators B Chem.* **2025**, *440*, 137931. <https://doi.org/10.1016/j.snb.2025.137931>.
11. Tang, H.; Zhong, Y.; Zeng, X.; Sang, Y.; Lin, F.; Zhu, Y.; Chen, Z.; Xu, L.; Huang, Z.; Zhou, P. Preparation of platinum decorated laser-induced graphene flexible electrode and its application for clenbuterol detection. *Int. J. Electrochem. Sci.* **2022**, *17*, 220241. <https://doi.org/10.20964/2022.02.08>.
12. Chen, J.; Ling, Y.; Yuan, X.; He, Y.; Li, S.; Wang, G.; Zhang, Z.; Wang, G. Highly sensitive detection of formaldehyde by laser-induced graphene-coated silver nanoparticles electrochemical sensing electrodes. *Langmuir* **2023**, *39*, 12762–12773. <https://doi.org/10.1021/acs.langmuir.3c01472>.
13. Liu, X.; Cheng, H.; Zhao, Y.; Wang, Y.; Li, F. Portable electrochemical biosensor based on laser-induced graphene and MnO<sub>2</sub> switch-bridged DNA signal amplification for sensitive detection of pesticide. *Biosens. Bioelectron.* **2022**, *199*, 113906, <https://doi.org/10.1016/j.bios.2021.113906>.
14. Reyes-Loaiza, V.; De La Roche, J.; Hernandez-Renjifo, E.; Idarraga, O.; Da Silva, M.; Valencia, D.P.; Ghneim-Herrera, T.; Jaramillo-Botero, A. Laser-induced graphene electrochemical sensor for quantitative detection of phytotoxic aluminum ions (Al<sup>3+</sup>) in soils extracts. *Sci. Rep.* **2024**, *14*, 5772. <https://doi.org/10.1038/s41598-024-56212-0>.
15. Vignesh, K.; Senthil Kumar, A.; Arumugam Napoleon, A.; Govindasamy, M.; Yusuf, K. Ag-La(OH)<sub>3</sub>@Dy<sub>2</sub>O<sub>3</sub> hybrid composite modified laser-induced graphene surface for simultaneous electrochemical detection of bisphenol A and tartrazine. *Appl. Surf. Sci.* **2024**, *676*, 160901. <https://doi.org/10.1016/j.apsusc.2024.160901>.
16. Zribi, R.; Johnson, Z.T.; Ellis, G.; Banwart, C.; Opare-Addo, J.; Hooe, S.L.; Breger, J.; Foti, A.; Gucciardi, P.G.; Smith, E.A.; et al. Molybdenum disulfide/diselenide-laser-induced graphene-

- glycine oxidase composite for electrochemical sensing of glyphosate. *ACS Appl Mater Interfaces* **2025**, *17*, 247–259. <https://doi.org/10.1021/acsami.4c14042>.
17. Huang, M.; Ye, L.; Yu, L.; Zhang, Y.; Zeng, T.; Yang, J.; Tian, F.; Wu, Z.; Zhang, X.; Hu, C.; et al. Incorporation of laser-induced graphene with hierarchical NiCo layered double hydroxide nanosheets for electrochemical determination of glucose in food and serum. *Anal. Chim. Acta* **2024**, *1329*, 343194. <https://doi.org/10.1016/j.aca.2024.343194>.
  18. Wang, Z.; Liu, M.; Shi, S.; Zhou, X.; Wu, C.; Wu, K. Ti<sub>3</sub>C<sub>2</sub>T<sub>x</sub>/laser-induced graphene-based micro-droplet electrochemical sensing platform for rapid and sensitive detection of benomyl. *Anal. Chim. Acta* **2024**, *1304*, 342526. <https://doi.org/10.1016/j.aca.2024.342526>.
  19. Saqib, M.; Dorozhko, E.V.; Barek, J.; Korotkova, E.I.; Semin, V.O.; Kolobova, E.; Erkovich, A.V. Sensitive electrochemical sensing of carbosulfan in food products on laser reduced graphene oxide sensor decorated with silver nanoparticles. *Microchem. J.* **2024**, *207*, <https://doi.org/10.1016/j.microc.2024.112253>.
  20. Nasraoui, S.; Ameer, S.; Al-Hamry, A.; Ben Ali, M.; Kanoun, O. Development of an efficient voltammetric sensor for the monitoring of 4-aminophenol based on flexible laser induced graphene electrodes modified with MWCNT-PANI. *Sensors* **2022**, *22*, 833. <https://doi.org/10.3390/s22030833>.
  21. Nasraoui, S.; Al-Hamry, A.; Teixeira, P.R.; Ameer, S.; Paterno, L.G.; Ben Ali, M.; Kanoun, O. Electrochemical sensor for nitrite detection in water samples using flexible laser-induced graphene electrodes functionalized by CNT decorated by Au nanoparticles. *J. Electroanal. Chem.* **2021**, *880*, <https://doi.org/10.1016/j.jelechem.2020.114893>.
  22. Settu, K.; Chiu, P.-T.; Huang, Y.-M. Laser-induced graphene-based enzymatic biosensor for glucose detection. *Polymers* **2021**, *13*, 2795. <https://doi.org/10.3390/polym13162795>.
  23. Soares, R.R.A.; Hjort, R.G.; Pola, C.C.; Parate, K.; Reis, E.L.; Soares, N.F.F.; McLamore, E.S.; Claussen, J.C.; Gomes, C.L. Laser-induced graphene electrochemical immunosensors for rapid and label-free monitoring of salmonella enterica in chicken broth. *ACS Sens.* **2020**, *5*, 1900–1911. <https://doi.org/10.1021/acssensors.9b02345>.
  24. Ding, X.; Chen, R.; Xu, J.; Hu, J.; Zhao, Z.; Zhang, C.; Zheng, L.; Cheng, H.; Weng, Z.; Wu, L. Highly stable scalable production of porous graphene-polydopamine nanocomposites for drug molecule sensing. *Talanta* **2025**, *282*, 126990. <https://doi.org/10.1016/j.talanta.2024.126990>.
  25. Yuan, X.; Chen, L.; Liu, R.; Li, S.; Wu, X.-w.; Ling, Y. Smartphone-assisted portable electrochemical sensing platform for point-of-care detection of thiocyanate using a laser-induced graphene composite electrode. *Anal. Chim. Acta* **2025**, *1368*, 344365. <https://doi.org/10.1016/j.aca.2025.344365>.
  26. Cavallaro, N.; Moreira, G.; Vanegas, D.; Xiang, D.; Datta, S.P.A.; Gomes, C.; McLamore, E.S. A *Listeria monocytogenes* aptasensor on laser inscribed graphene for food safety monitoring in hydroponic water. *Discov. Food* **2024**, *4*, 169. <https://doi.org/10.1007/s44187-024-00251-z>.
  27. Zhao, F.; He, J.; Li, X.; Bai, Y.; Ying, Y.; Ping, J. Smart plant-wearable biosensor for in-situ pesticide analysis. *Biosens. Bioelectron.* **2020**, *170*, 112636. <https://doi.org/10.1016/j.bios.2020.112636>.
  28. Kongkaew, S.; Srilikhit, A.; Janduang, S.; Thipwimonmas, Y.; Kanatharana, P.; Thavarungkul, P.; Limbut, W. Single laser synthesis of gold nanoparticles-polypyrrole-chitosan on laser-induced graphene for ascorbic acid detection. *Talanta* **2024**, *278*, 126446. <https://doi.org/10.1016/j.talanta.2024.126446>.
  29. Garland, N.T.; McLamore, E.S.; Cavallaro, N.D.; Mendivelso-Perez, D.; Smith, E.A.; Jing, D.; Claussen, J.C. Flexible laser-induced graphene for nitrogen sensing in soil. *ACS Appl. Mater. Interfaces* **2018**, *10*, 39124–39133. <https://doi.org/10.1021/acsami.8b10991>.
